# Supplementary material for: One-pot self-assembly synthesis of Ni-doped ordered mesoporous carbon for quantitative hydrogenation of furfural to furfuryl alcohol
Source: Royal Society of Chemistry journal article supplement (doi:10.1039/d0gc04029k), 2021-01-01
Supplement: d0gc04029k1.pdf [file d0gc04029k1.pdf]

## Supporting information for

# One-pot self-assembly synthesis of Ni-doped ordered mesoporous carbons for quantitative hydrogenation of furfural to furfuryl alcohol

Yiwei Tang <sup>a</sup>, Mo Qiu <sup>a</sup>, Jirui Yang <sup>a</sup>, Feng Shen <sup>a</sup>, Xiaoqi Wang <sup>a</sup>, Xinhua Qi <sup>b, c\*</sup>

<sup>a</sup> *Agro-Environmental Protection Institute, Chinese Academy of Agricultural Sciences, No. 31, Fukang Road, Nankai District, Tianjin 300191, China*

<sup>b</sup> *College of Environmental Science and Engineering, Nankai University, No. 38, Tongyan Road, Jinnan District, Tianjin 300350, China.*

<sup>c</sup> *National & Local Joint Engineering Research Center of Biomass Resource Utilization, Tianjin 300350, China.*

Corresponding Author:

Email: [qixinhua@nankai.edu.cn](mailto:qixinhua@nankai.edu.cn) (X. Qi); Tel (Fax): 86-22-2350-8807

Total number of pages: 4

Total number of tables: 2

Total number of figures: 1

---

\* Corresponding author. Email: [qixinhua@nankai.edu.cn](mailto:qixinhua@nankai.edu.cn) (X. Qi); Tel (Fax): 86-22-2350-8807.

Table S1 The properties of Ni<sub>0.5</sub>@OMC samples of different calcination temperatures.

| Entry | Catalysts                  | S <sub>BET</sub> <sup>a</sup><br>(m <sup>2</sup> g <sup>-1</sup> ) | V <sub>M</sub> <sup>b</sup><br>(cm <sup>3</sup> g <sup>-1</sup> ) | W <sub>M</sub> <sup>c</sup><br>(nm) | D <sub>Ni</sub> <sup>d</sup><br>(nm) | Ni content <sup>e</sup><br>(wt%) |
|-------|----------------------------|--------------------------------------------------------------------|-------------------------------------------------------------------|-------------------------------------|--------------------------------------|----------------------------------|
| 1     | Ni <sub>0.5</sub> @OMC-600 | 538.6                                                              | 0.46                                                              | 3.71                                | 7.8                                  | 17.8                             |
| 2     | Ni <sub>0.5</sub> @OMC-700 | 519.8                                                              | 0.46                                                              | 3.72                                | 12.8                                 | 22.6                             |
| 3     | Ni <sub>0.5</sub> @OMC-800 | 512.2                                                              | 0.41                                                              | 3.94                                | 20.4                                 | 25.4                             |

<sup>a</sup> The specific surface area was calculated using BET model.

<sup>b</sup> The mesopore volume (V<sub>M</sub>) was determined using BJH model.

<sup>c</sup> The centered pore diameter (W<sub>M</sub>) was calculated with the BJH model

<sup>d</sup> Ni particle size was calculated by using the Scherrer equation based on XRD.

<sup>e</sup> Obtained by the ICP-OES measurement

Table S2 The polar parameters of different solvents and FFA, and the reaction rate constants of catalytic hydrogenation of furfural to FFA by Ni<sub>0.5</sub>@OMC-600 in different solvents

| Entry | Solvent          | E <sub>T</sub> (30) <sup>a</sup> (kcal mol <sup>-1</sup> ) | K <sup>b</sup> × 10 <sup>-2</sup> ( h <sup>-1</sup> ) |
|-------|------------------|------------------------------------------------------------|-------------------------------------------------------|
| 1     | H <sub>2</sub> O | 63.1                                                       | 4.89                                                  |
| 2     | methanol         | 55.5                                                       | 3.83                                                  |
| 3     | ethanol          | 51.9                                                       | 2.34                                                  |
| 4     | 1-propanol       | 50.7                                                       | 1.93                                                  |
| 5     | 2-propanol       | 48.6                                                       | 1.27                                                  |

<sup>a</sup> E<sub>T</sub>(30) is Dimroth–Reichardt’s polarity parameter<sup>1</sup>. <sup>b</sup> Reaction conditions: 3 mmol of furfural, 100 mg Ni<sub>0.5</sub>@OMC-600, 10 ml of solvent, 160 °C and 3MPa H<sub>2</sub>.

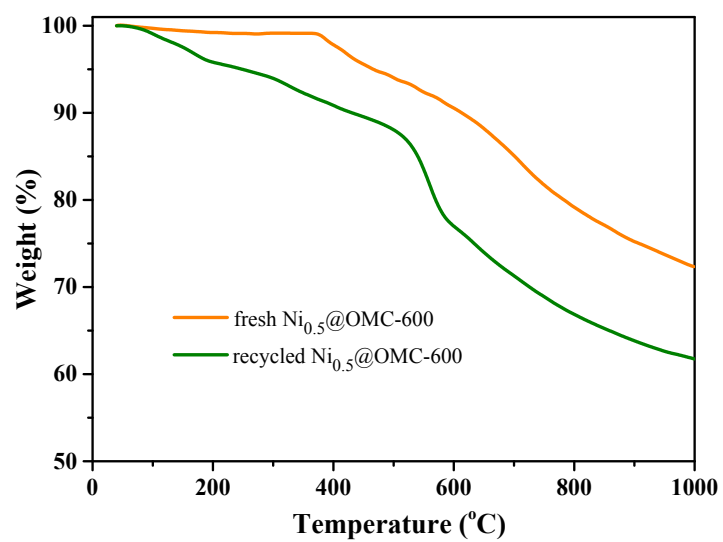

Figure S1. TG analysis of the fresh and recycled catalysts

## References

1. C. Reichardt, *Angew. Chem. Int. Ed.*, 1979, 18, 98-110.
